# Supplementary material for: First principles study on thickness dependent structural and electronic properties unveiling the growth and stability of 2D layered II–VI semiconducting compounds
Source: Royal Society of Chemistry journal article supplement (doi:10.1039/d2cp03664a), 2022-01-01
Supplement: d2cp03664a1.pdf [file d2cp03664a1.pdf]

## Supporting Information

# First Principles Study on Thickness Dependent Structural and Electronic Properties Unveiling Growth and Stability of 2D Layered II-VI Semiconducting Compounds.

P. Devi<sup>†</sup>, D. Mahendiran<sup>†,‡</sup>, and P. Murugan<sup>†,‡,\*</sup>

<sup>†</sup>Electrochemical Power Sources Division, CSIR Central Electrochemical Research Institute, Karaikudi - 630003, Tamil Nadu, India

<sup>‡</sup>Academy of Scientific and Innovative Research (AcSIR), Ghaziabad - 201002, Ghaziabad District, Uttar Pradesh, India

\*E-mail: [murugan@cecri.res.in](mailto:murugan@cecri.res.in)

### Table of Contents

Fig. S1 – Cut-off energy optimization for WZ phase of MO and MX compounds.

Fig. S2 – CBM and VBM as a function of uniaxial strain of 2D-MO and 2D-MX surface slabs with thickness of 2L.

Fig. S3 – Ball and Stick model of various thicknesses of 2D-ZnS and 2D-CdS surface slabs.

Fig. S4 – Layer resolved DOS of 10L thick WZ-ZnTe slab.

Fig. S5 – Calculated  $E_{exf}$  values for various thick (2L to 10L) 2D-MO and 2D-MX surface slabs.

Fig. S6 – DOS and BS of 3L and 4L thick 2D-CdX surface slab.

Fig. S7 – DOS and BS of 10L thick WZ-CdX surface slab.

Fig. S8 – Partial charge density of 2L thick 2D-ZnTe surface slab.

Table S1 – Zn-X bond distances of various thicknesses of 2D-ZnX surface slabs.

Table S2 – Cd-X bond distances of various thicknesses of 2D-CdX surface slabs.

Table S3 – Interlayer Zn-X distances of various thicknesses of 2D-ZnX surface slabs.

Table S4 – Interlayer Cd-X distances of various thicknesses of 2D-CdX surface slabs.

Table S5 – Interlayer M-X distances of various thicknesses of WZ-MX surface slabs.

Table S6 – Buckling distances of various thicknesses of 2D-ZnX surface slabs.

Table S7 – Buckling distances of various thicknesses of 2D-CdX surface slabs.

Table S8 – Mechanical properties of 2L 2D-MX surface slabs.

Table S9 – Band gap of various thicknesses of 2D-MX surface slabs.

Table S10 – Effective mass of various thicknesses of 2D-MX surface slabs.

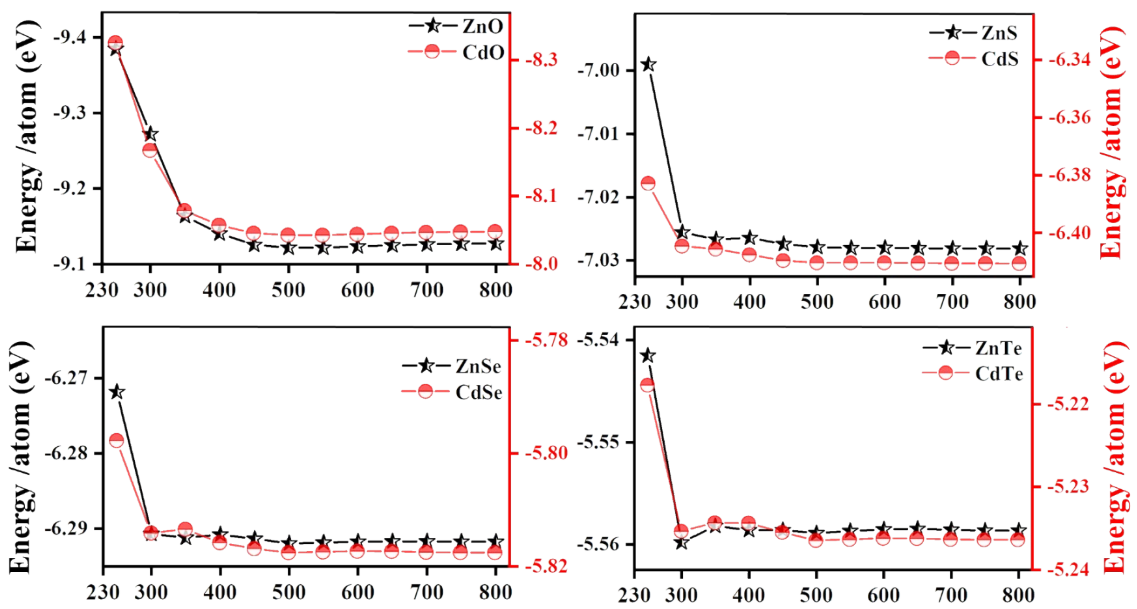

Fig. S1 : Cut-off energy optimization for WZ phase of MO and MX compounds.

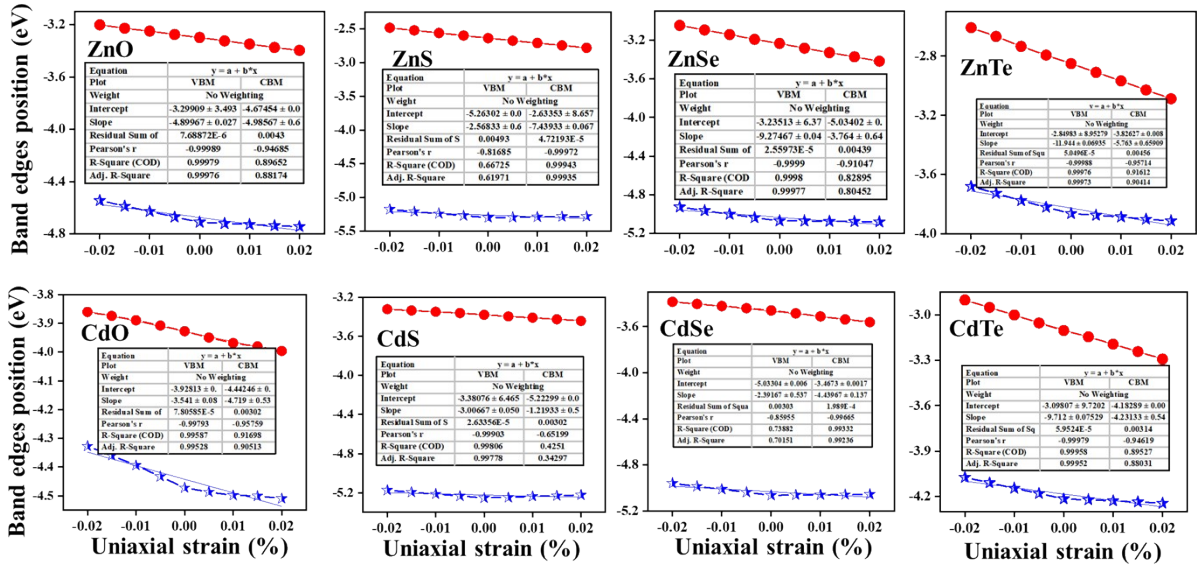

Fig. S2: CBM (red line) and VBM (blue line) as a function of uniaxial strain of MX 2L (high symmetry direction  $\Gamma \rightarrow K$ )

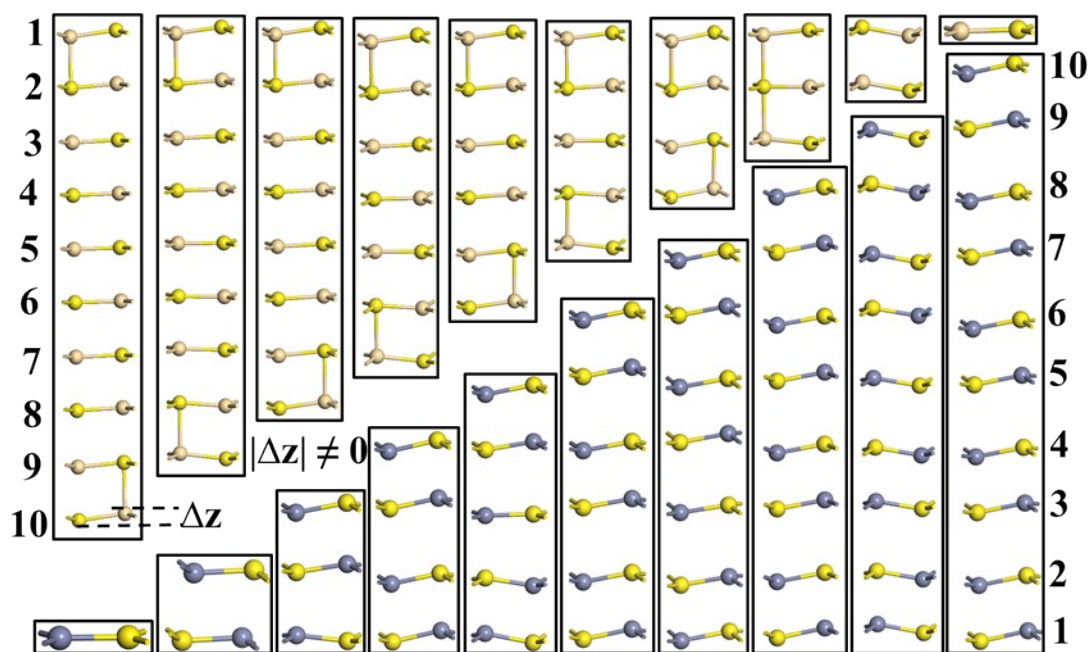

Fig. S3: Ball and stick model of optimized structures of various thick (1L to 10L) ZnS (lower diagonal) and CdS (upper diagonal) surface slabs. Grey, sandal and yellow coloured ball represent Zn, Cd and S atoms, respectively.

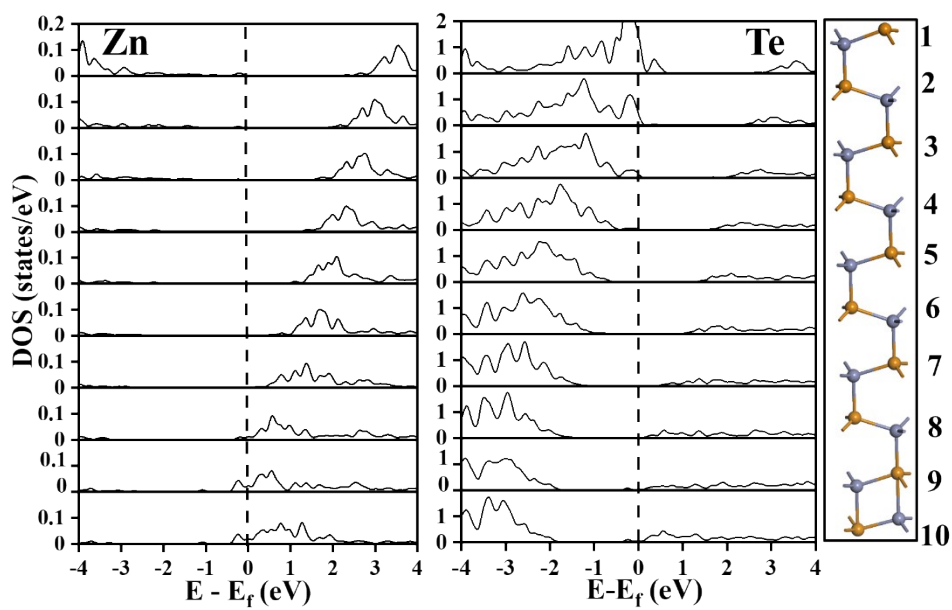

Fig. S4 : Layer resolved DOS of 10L thick WZ slab of ZnTe compound is given. For clarity, atomic structure is provided in right panel where layers are indexed. This figure clearly indicates the holes and electrons are spatially separated in the surface slab. This kind of feature can be seen in WZ slabs of these compounds.

Table S1 : Typical Zn-X bond distances (in Å) along xy-axis of various thick (1L to 10L) of 2D-MX surface slabs. For comparison, bulk bond distances are given at last row.

| <b>nL</b>   | <b>Zn-O</b> | <b>Zn-S</b>   | <b>Zn-Se</b>  | <b>Zn-Te</b>  |
|-------------|-------------|---------------|---------------|---------------|
| <b>1</b>    | 1.896       | 2.236         | 2.364         | 2.563         |
| <b>2</b>    | 1.925       | 2.303         | 2.448         | 2.649         |
| <b>3</b>    | 1.935       | 2.269 - 2.293 | 2.383 - 2.439 | 2.567 - 2.647 |
| <b>4</b>    | 1.942       | 2.297 - 2.303 | 2.444 - 2.447 | 2.647 - 2.648 |
| <b>5</b>    | 1.946       | 2.258 - 2.303 | 2.383 - 2.446 | 2.566 - 2.654 |
| <b>6</b>    | 1.949       | 2.295 - 2.305 | 2.443 - 2.449 | 2.648 - 2.650 |
| <b>7</b>    | 1.952       | 2.304 - 2.277 | 2.375 - 3.449 | 2.599 - 2.671 |
| <b>8</b>    | 1.954       | 2.294 - 2.304 | 2.385 - 2.469 | 2.648 - 2.650 |
| <b>9</b>    | 1.955       | 2.295 - 2.305 | 2.383 - 2.449 | 2.564 - 2.652 |
| <b>10</b>   | 1.956       | 2.295 - 2.306 | 2.390 - 2.455 | 2.646 - 2.648 |
| <b>Bulk</b> | 1.99        | 2.32          | 2.45          | 2.63          |

Table S2 : Typical Cd-X bond distances (in Å) along xy-axis of various thick (1L to 10L) of 2D-MX surface slabs. For comparison, bulk bond distances are given at last row.

| <b>nL</b>   | <b>Cd-O</b> | <b>Cd-S</b>   | <b>Cd-Se</b>  | <b>Cd-Te</b>  |
|-------------|-------------|---------------|---------------|---------------|
| <b>1</b>    | 2.115       | 2.446         | 2.572         | 2.760         |
| <b>2</b>    | 2.153       | 2.517         | 2.649         | 2.840         |
| <b>3</b>    | 2.170       | 2.497 - 2.510 | 2.594 - 2.646 | 2.758 - 2.840 |
| <b>4</b>    | 2.179       | 2.513 - 2.525 | 2.642-6.50    | 2.840 - 2.842 |
| <b>5</b>    | 2.185       | 2.508 - 2.528 | 2.589 - 2.658 | 2.756 - 2.844 |
| <b>6</b>    | 2.190       | 2.512 - 2.531 | 2.639 - 2.652 | 2.838 - 2.842 |
| <b>7</b>    | 2.193       | 2.516 - 2.537 | 2.587 - 2.666 | 2.756 - 2.844 |
| <b>8</b>    | 2.196       | 2.518 - 2.538 | 2.640 - 2.655 | 2.801 - 2.868 |
| <b>9</b>    | 2.198       | 2.519 - 2.540 | 2.597-2.662   | 2.743 - 2.848 |
| <b>10</b>   | 2.199       | 2.521 - 2.540 | 2.643 - 2.656 | 2.800 - 2.873 |
| <b>Bulk</b> | 2.23        | 2.55          | 2.68          | 2.81          |

In these Tables (S1 & S2), M-X bond distances, along xy axis of layers, in odd nL are observed to varied significantly as compared to even nL, owing to instability of former case.



Table S3 : Interlayer distances (in Å) of various thick (nL) of 2D-ZnX surface slabs are reported. Left and right diagonal panels correspond to even and odd-number layered surface slabs, respectively.

| nL | INTERLAYERDISTANCE OF ODD LAYERS |      |      |       |       |      |      |      |      |    |
|----|----------------------------------|------|------|-------|-------|------|------|------|------|----|
|    | ZnS                              | 8-9  | 7-8  | 6-7   | 5-6   | 4-5  | 3-4  | 2-3  | 1-2  |    |
| 2  | 2.64                             | 2.65 | 3.44 | 2.64  | 3.42  | 3.44 | 2.67 | 3.42 | 2.63 | 9  |
| 4  | 2.64                             | 2.63 | 3.47 | 2.65  | 3.44  | 3.45 | 2.64 | 3.46 | 2.65 | 7  |
| 6  | 2.63                             | 3.46 | 2.66 | 2.68  | 3.16  | 3.41 | 2.66 | 3.49 | 2.63 | 5  |
| 8  | 2.66                             | 3.47 | 2.63 | 2.63  | 3.48  | 2.99 | 2.70 | 3.43 | 2.65 | 3  |
| 10 | 2.63                             | 3.45 | 2.65 | 3.433 | 2.662 | 2.72 | 2.95 | 3.43 | 2.62 |    |
|    | 2.66                             | 3.43 | 2.65 | 3.454 | 2.629 | 2.65 | 3.39 | 3.11 | 2.69 |    |
|    | 2.63                             | 3.46 | 2.64 | 3.40  | 2.65  | 3.43 | 2.66 | 2.64 | 3.43 |    |
|    | 2.66                             | 3.44 | 2.65 | 3.40  | 2.64  | 3.45 | 2.63 | 2.72 | 2.81 |    |
|    | 2.62                             | 3.45 | 2.64 | 3.42  | 2.65  | 3.42 | 2.65 | 3.44 | 2.66 |    |
|    | 2.66                             | 3.43 | 2.65 | 3.42  | 2.64  | 3.42 | 2.64 | 3.45 | 2.62 |    |
|    | 1-2                              | 2-3  | 3-4  | 4-5   | 5-6   | 6-7  | 7-8  | 8-9  | 9-10 | nL |

  

| nL | INTERLAYERDISTANCE OF ODD LAYERS |      |       |      |      |      |      |      |      |    |
|----|----------------------------------|------|-------|------|------|------|------|------|------|----|
|    | ZnTe                             | 8-9  | 7-8   | 6-7  | 5-6  | 4-5  | 3-4  | 2-3  | 1-2  |    |
| 2  | 2.83                             | 2.83 | 4.15  | 2.83 | 4.16 | 2.83 | 4.14 | 2.85 | 3.00 | 9  |
| 4  | 2.83                             | 2.84 | 4.16  | 2.84 | 4.17 | 2.84 | 4.17 | 2.86 | 4.57 | 7  |
| 6  | 2.84                             | 4.18 | 2.842 | 2.83 | 4.18 | 2.83 | 4.15 | 2.85 | 3.01 | 5  |
| 8  | 2.84                             | 4.18 | 2.841 | 2.84 | 4.18 | 2.84 | 4.18 | 2.86 | 4.57 | 3  |
| 10 | 2.84                             | 4.19 | 2.84  | 4.18 | 2.84 | 2.83 | 4.13 | 2.85 | 2.98 |    |
|    | 2.83                             | 4.19 | 2.84  | 4.17 | 2.84 | 2.84 | 4.16 | 2.86 | 4.55 |    |
|    | 2.83                             | 4.18 | 2.84  | 4.18 | 2.84 | 4.17 | 2.84 | 4.16 | 2.86 |    |
|    | 2.84                             | 4.18 | 2.84  | 4.19 | 2.84 | 4.16 | 2.84 | 2.86 | 4.55 |    |
|    | 2.83                             | 4.16 | 2.83  | 4.16 | 2.84 | 4.16 | 2.84 | 4.17 | 2.84 |    |
|    | 2.84                             | 4.16 | 2.83  | 4.16 | 2.84 | 4.16 | 2.84 | 4.17 | 2.84 |    |
|    | 1-2                              | 2-3  | 3-4   | 4-5  | 5-6  | 6-7  | 7-8  | 8-9  | 9-10 | nL |

  

| nL | INTERLAYERDISTANCE OF ODD LAYERS |      |      |      |      |      |      |      |      |    |
|----|----------------------------------|------|------|------|------|------|------|------|------|----|
|    | ZnO                              | 8-9  | 7-8  | 6-7  | 5-6  | 4-5  | 3-4  | 2-3  | 1-2  |    |
| 2  | 2.44                             | 2.36 | 2.39 | 2.38 | 2.38 | 2.38 | 2.38 | 2.39 | 2.36 | 9  |
| 4  | 2.44                             | 2.39 | 2.39 | 2.38 | 2.38 | 2.38 | 2.38 | 2.38 | 2.39 | 7  |
| 6  | 2.39                             | 2.42 | 2.42 | 2.40 | 2.39 | 2.39 | 2.39 | 2.39 | 2.40 | 5  |
| 8  | 2.43                             | 2.42 | 2.39 | 2.37 | 2.39 | 2.39 | 2.40 | 2.41 | 2.38 | 3  |
| 10 | 2.37                             | 2.40 | 2.39 | 2.40 | 2.40 | 2.41 | 2.40 | 2.41 | 2.38 |    |
|    | 2.40                             | 2.40 | 2.40 | 2.40 | 2.38 | 2.38 | 2.41 | 2.40 | 2.41 |    |
|    | 2.36                             | 2.39 | 2.38 | 2.38 | 2.39 | 2.39 | 2.39 | 2.44 | 2.41 |    |
|    | 2.39                             | 2.39 | 2.38 | 2.38 | 2.39 | 2.39 | 2.36 | 2.44 | 2.44 |    |
|    | 2.36                             | 2.38 | 2.38 | 2.37 | 2.37 | 2.37 | 2.38 | 2.38 | 2.39 |    |
|    | 2.39                             | 2.38 | 2.38 | 2.37 | 2.37 | 2.38 | 2.38 | 2.38 | 2.36 |    |
|    | 1-2                              | 2-3  | 3-4  | 4-5  | 5-6  | 6-7  | 7-8  | 8-9  | 9-10 | nL |

  

| nL | INTERLAYERDISTANCE OF ODD LAYERS |      |      |      |      |      |      |      |      |    |
|----|----------------------------------|------|------|------|------|------|------|------|------|----|
|    | ZnSe                             | 8-9  | 7-8  | 6-7  | 5-6  | 4-5  | 3-4  | 2-3  | 1-2  |    |
| 2  | 2.70                             | 2.70 | 3.79 | 2.70 | 3.79 | 2.70 | 3.75 | 2.73 | 2.93 | 9  |
| 4  | 2.70                             | 2.70 | 3.81 | 2.71 | 3.80 | 2.70 | 3.79 | 2.72 | 4.02 | 7  |
| 6  | 2.70                             | 3.80 | 2.71 | 2.70 | 3.77 | 2.70 | 3.75 | 2.73 | 2.92 | 5  |
| 8  | 2.71                             | 3.80 | 2.70 | 2.70 | 3.79 | 2.71 | 3.79 | 2.72 | 4.01 | 3  |
| 10 | 2.70                             | 3.78 | 2.71 | 3.80 | 2.70 | 2.70 | 3.74 | 2.73 | 2.93 |    |
|    | 2.71                             | 3.77 | 2.70 | 3.80 | 2.69 | 2.70 | 3.78 | 2.73 | 4.03 |    |
|    | 2.70                             | 3.79 | 2.71 | 3.78 | 2.71 | 3.77 | 2.70 | 2.73 | 2.91 |    |
|    | 2.71                             | 3.78 | 2.71 | 3.78 | 2.71 | 3.79 | 2.69 | 2.72 | 4.03 |    |
|    | 2.69                             | 3.77 | 2.71 | 3.76 | 2.70 | 3.76 | 2.70 | 3.74 | 2.71 |    |
|    | 2.70                             | 3.76 | 2.71 | 3.76 | 2.70 | 3.75 | 2.71 | 3.75 | 2.69 |    |
|    | 1-2                              | 2-3  | 3-4  | 4-5  | 5-6  | 6-7  | 7-8  | 8-9  | 9-10 | nL |

Table S4 : Interlayer distances (in Å) of various thick (nL) of 2D-CdX surface slabs are reported. Left and right diagonal panels correspond to even and odd number layered surface slabs, respectively.

| nL | INTERLAYERDISTANCE OF ODD LAYERS |      |      |      |      |      |      |      |      |    |
|----|----------------------------------|------|------|------|------|------|------|------|------|----|
|    | CdS                              | 8-9  | 7-8  | 6-7  | 5-6  | 4-5  | 3-4  | 2-3  | 1-2  |    |
| 2  | 2.83                             | 2.74 | 3.03 | 2.82 | 2.90 | 2.86 | 2.87 | 2.92 | 2.86 | 9  |
| 4  | 2.84                             | 2.87 | 2.92 | 2.87 | 2.86 | 2.90 | 2.82 | 3.03 | 2.74 | 7  |
| 6  | 2.78                             | 3.22 | 2.85 | 2.87 | 2.92 | 2.91 | 2.83 | 3.04 | 2.75 | 5  |
| 8  | 2.86                             | 3.22 | 2.78 | 2.75 | 3.05 | 2.83 | 2.91 | 2.92 | 2.87 | 3  |
| 10 | 2.76                             | 3.13 | 2.83 | 3.07 | 2.86 | 2.90 | 2.86 | 3.04 | 2.75 | 1  |
|    | 2.86                             | 3.07 | 2.83 | 3.13 | 2.76 | 2.75 | 3.03 | 2.87 | 2.89 |    |
|    | 2.75                             | 3.05 | 2.82 | 2.95 | 2.85 | 2.97 | 2.86 | 3.01 | 2.76 |    |
|    | 2.86                             | 2.96 | 2.85 | 2.95 | 2.82 | 3.06 | 2.75 | 2.75 | 3.02 |    |
|    | 2.74                             | 3.01 | 2.82 | 2.91 | 2.85 | 2.89 | 2.86 | 2.93 | 2.86 |    |
|    | 2.86                             | 2.92 | 2.86 | 2.89 | 2.85 | 2.91 | 2.82 | 3.03 | 2.74 |    |
|    | 1-2                              | 2-3  | 3-4  | 4-5  | 5-6  | 6-7  | 7-8  | 8-9  | 9-10 | nL |

| nL | INTERLAYERDISTANCE OF ODD LAYERS |      |      |      |      |      |      |      |      |    |
|----|----------------------------------|------|------|------|------|------|------|------|------|----|
|    | CdO                              | 8-9  | 7-8  | 6-7  | 5-6  | 4-5  | 3-4  | 2-3  | 1-2  |    |
| 2  | 2.55                             | 2.50 | 2.50 | 2.50 | 2.50 | 2.50 | 2.50 | 2.50 | 2.49 | 9  |
| 4  | 2.55                             | 2.49 | 2.50 | 2.50 | 2.50 | 2.50 | 2.50 | 2.51 | 2.50 | 7  |
| 6  | 2.52                             | 2.53 | 2.53 | 2.50 | 2.51 | 2.50 | 2.50 | 2.51 | 2.50 | 5  |
| 8  | 2.52                             | 2.53 | 2.52 | 2.50 | 2.51 | 2.51 | 2.52 | 2.51 | 2.50 | 3  |
| 10 | 2.51                             | 2.51 | 2.51 | 2.52 | 2.51 | 2.51 | 2.52 | 2.52 | 2.51 | 1  |
|    | 2.51                             | 2.52 | 2.57 | 2.52 | 2.51 | 2.51 | 2.52 | 2.52 | 2.51 |    |
|    | 2.50                             | 2.50 | 2.51 | 2.50 | 2.50 | 2.51 | 2.50 | 2.54 | 2.54 |    |
|    | 2.50                             | 2.51 | 2.51 | 2.50 | 2.51 | 2.50 | 2.50 | 2.54 | 2.54 |    |
|    | 2.49                             | 2.50 | 2.50 | 2.50 | 2.50 | 2.50 | 2.50 | 2.50 | 2.50 |    |
|    | 2.50                             | 2.50 | 2.50 | 2.50 | 2.50 | 2.50 | 2.50 | 2.50 | 2.49 |    |
|    | 1-2                              | 2-3  | 3-4  | 4-5  | 5-6  | 6-7  | 7-8  | 8-9  | 9-10 | nL |

| nL | INTERLAYERDISTANCE OF ODD LAYERS |      |      |      |      |      |      |      |      |    |
|----|----------------------------------|------|------|------|------|------|------|------|------|----|
|    | CdTe                             | 8-9  | 7-8  | 6-7  | 5-6  | 4-5  | 3-4  | 2-3  | 1-2  |    |
| 2  | 3.07                             | 3.07 | 4.02 | 3.07 | 4.02 | 3.07 | 4.00 | 3.09 | 3.21 | 9  |
| 4  | 3.08                             | 3.07 | 4.03 | 3.08 | 4.03 | 3.08 | 4.02 | 3.09 | 4.82 | 7  |
| 6  | 3.07                             | 4.05 | 3.08 | 3.07 | 4.02 | 3.07 | 3.99 | 3.09 | 3.20 | 5  |
| 8  | 3.08                             | 4.05 | 3.08 | 3.07 | 4.03 | 3.08 | 4.01 | 3.09 | 4.80 | 3  |
| 10 | 3.07                             | 4.04 | 3.08 | 4.03 | 3.08 | 3.07 | 3.99 | 3.09 | 3.22 | 1  |
|    | 3.08                             | 4.03 | 3.08 | 4.03 | 3.07 | 3.07 | 4.01 | 3.09 | 4.82 |    |
|    | 3.07                             | 4.04 | 3.08 | 4.04 | 3.08 | 4.03 | 3.08 | 3.08 | 3.20 |    |
|    | 3.08                             | 4.03 | 3.08 | 4.03 | 3.08 | 4.04 | 3.07 | 3.08 | 4.80 |    |
|    | 3.07                             | 4.03 | 3.08 | 4.02 | 3.08 | 4.02 | 3.08 | 4.03 | 3.08 |    |
|    | 3.08                             | 4.03 | 3.08 | 4.02 | 3.08 | 4.02 | 3.08 | 4.03 | 3.07 |    |
|    | 1-2                              | 2-3  | 3-4  | 4-5  | 5-6  | 6-7  | 7-8  | 8-9  | 9-10 | nL |

| nL | INTERLAYERDISTANCE OF ODD LAYERS |      |      |      |      |      |      |      |      |    |
|----|----------------------------------|------|------|------|------|------|------|------|------|----|
|    | CdSe                             | 8-9  | 7-8  | 6-7  | 5-6  | 4-5  | 3-4  | 2-3  | 1-2  |    |
| 2  | 2.93                             | 3.65 | 2.89 | 3.56 | 2.91 | 3.54 | 2.91 | 3.56 | 2.89 | 9  |
| 4  | 2.93                             | 2.93 | 2.98 | 3.47 | 2.91 | 3.53 | 2.91 | 3.53 | 2.92 | 7  |
| 6  | 2.91                             | 3.58 | 2.94 | 3.64 | 2.89 | 3.53 | 2.91 | 3.55 | 2.89 | 5  |
| 8  | 2.94                             | 3.58 | 2.91 | 2.92 | 2.97 | 3.45 | 2.91 | 3.51 | 2.92 | 3  |
| 10 | 2.90                             | 3.57 | 2.92 | 3.56 | 2.94 | 2.96 | 3.06 | 3.57 | 2.86 | 1  |
|    | 2.94                             | 3.55 | 2.92 | 3.57 | 2.90 | 2.86 | 3.57 | 3.06 | 2.96 |    |
|    | 2.90                             | 3.56 | 2.91 | 3.54 | 2.92 | 3.54 | 2.94 | 2.98 | 2.94 |    |
|    | 2.94                             | 3.54 | 2.92 | 3.54 | 2.92 | 3.56 | 2.90 | 2.87 | 3.69 |    |
|    | 2.90                             | 3.56 | 2.92 | 3.54 | 2.92 | 3.55 | 2.92 | 3.55 | 2.93 |    |
|    | 2.93                             | 3.54 | 2.92 | 3.54 | 2.92 | 3.55 | 2.92 | 3.57 | 2.90 |    |
|    | 1-2                              | 2-3  | 3-4  | 4-5  | 5-6  | 6-7  | 7-8  | 8-9  | 9-10 | nL |



Table S5: Interlayer distances (in Å) of MX (except CdO) various thick surface slabs (nL) are provided. Pink and yellow color marked boxes correspond to M-X bonding side and non-bonding side of surface slabs (refer Fig. 2), respectively.

| nL   |      | INTERLAYERDISTANCE OF WURZITE SLABS |      |      |      |      |      |      |      |      |  |
|------|------|-------------------------------------|------|------|------|------|------|------|------|------|--|
|      |      | 1-2                                 | 2-3  | 3-4  | 4-5  | 5-6  | 6-7  | 7-8  | 8-9  | 9-10 |  |
| ZnO  | 7    | 2.16                                | 2.13 | 2.12 | 2.13 | 2.14 | 2.22 |      |      |      |  |
|      |      | 2.88                                | 3.00 | 3.02 | 3.02 | 3.01 | 2.94 |      |      |      |  |
|      | 8    | 2.14                                | 2.09 | 2.08 | 2.08 | 2.09 | 2.10 | 2.18 |      |      |  |
|      |      | 2.91                                | 3.04 | 3.06 | 3.07 | 3.07 | 3.07 | 3.01 |      |      |  |
|      | 9    | 2.13                                | 2.07 | 2.07 | 2.07 | 2.07 | 2.07 | 2.08 | 2.16 |      |  |
|      |      | 2.93                                | 3.08 | 3.11 | 3.11 | 3.11 | 3.11 | 3.10 | 3.04 |      |  |
|      | 10   | 2.12                                | 2.06 | 2.06 | 2.05 | 2.05 | 2.05 | 2.05 | 2.07 | 2.14 |  |
|      |      | 2.94                                | 3.10 | 3.14 | 3.14 | 3.14 | 3.14 | 3.13 | 3.13 | 3.07 |  |
|      | ZnS  | 6                                   | 2.56 | 2.52 | 2.50 | 2.51 | 2.49 |      |      |      |  |
|      |      |                                     | 2.96 | 3.60 | 3.55 | 3.57 | 3.64 |      |      |      |  |
| 7    |      | 2.51                                | 2.46 | 2.45 | 2.45 | 2.45 | 2.45 |      |      |      |  |
|      |      | 3.19                                | 3.69 | 3.67 | 3.67 | 3.67 | 3.74 |      |      |      |  |
| 8    |      | 2.43                                | 2.40 | 2.39 | 2.39 | 2.39 | 2.39 | 2.40 |      |      |  |
|      |      | 3.71                                | 3.80 | 3.79 | 3.79 | 3.79 | 3.79 | 3.87 |      |      |  |
| 9    |      | 2.42                                | 2.38 | 2.38 | 2.38 | 2.38 | 2.38 | 2.38 | 2.39 |      |  |
|      |      | 3.75                                | 3.82 | 3.82 | 3.82 | 3.82 | 3.81 | 3.81 | 3.89 |      |  |
| 10   |      | 2.41                                | 2.37 | 2.37 | 2.37 | 2.37 | 2.37 | 2.37 | 2.38 | 2.39 |  |
|      |      | 3.77                                | 3.84 | 3.83 | 3.82 | 3.82 | 3.83 | 3.83 | 3.83 | 3.90 |  |
| ZnSe | 5    | 2.62                                | 2.64 | 2.68 | 2.67 |      |      |      |      |      |  |
|      |      | 3.89                                | 3.77 | 3.92 | 2.82 |      |      |      |      |      |  |
|      | 6    | 2.59                                | 2.60 | 2.60 | 2.63 | 2.66 |      |      |      |      |  |
|      |      | 3.96                                | 3.85 | 3.83 | 3.93 | 2.84 |      |      |      |      |  |
|      | 7    | 2.56                                | 2.56 | 2.56 | 2.57 | 2.59 | 2.65 |      |      |      |  |
|      |      | 4.00                                | 3.91 | 3.92 | 3.90 | 3.96 | 2.88 |      |      |      |  |
|      | 8    | 2.53                                | 2.53 | 2.53 | 2.54 | 2.54 | 2.57 | 2.66 |      |      |  |
|      |      | 4.02                                | 3.94 | 3.96 | 3.96 | 3.93 | 3.97 | 2.91 |      |      |  |
|      | 9    | 2.52                                | 2.52 | 2.51 | 2.52 | 2.52 | 2.53 | 2.56 | 2.67 |      |  |
|      |      | 4.04                                | 3.97 | 3.98 | 3.98 | 3.98 | 3.95 | 3.98 | 2.91 |      |  |
| 10   | 2.52 | 2.51                                | 2.51 | 2.51 | 2.51 | 2.51 | 2.52 | 2.56 | 2.67 |      |  |
|      | 4.05 | 3.99                                | 4.00 | 4.00 | 4.00 | 4.00 | 3.97 | 3.99 | 2.92 |      |  |
| ZnTe | 4    | 2.86                                | 2.92 | 2.82 |      |      |      |      |      |      |  |
|      |      | 4.24                                | 4.44 | 2.88 |      |      |      |      |      |      |  |
|      | 5    | 2.77                                | 2.78 | 2.81 | 2.80 |      |      |      |      |      |  |
|      |      | 4.39                                | 4.24 | 4.40 | 2.88 |      |      |      |      |      |  |
|      | 6    | 2.73                                | 2.74 | 2.74 | 2.76 | 2.79 |      |      |      |      |  |
|      |      | 4.44                                | 4.31 | 4.28 | 4.37 | 2.90 |      |      |      |      |  |
|      | 7    | 2.70                                | 2.71 | 2.71 | 2.71 | 2.73 | 2.79 |      |      |      |  |
|      |      | 4.48                                | 4.33 | 4.33 | 4.29 | 4.37 | 2.90 |      |      |      |  |
|      | 8    | 2.69                                | 2.70 | 2.70 | 2.70 | 2.70 | 2.72 | 2.78 |      |      |  |
|      |      | 4.51                                | 4.35 | 4.35 | 4.5  | 4.30 | 4.36 | 2.91 |      |      |  |
| 9    | 2.68 | 2.69                                | 2.71 | 2.69 | 2.69 | 2.69 | 2.71 | 2.78 |      |      |  |
|      | 4.52 | 4.37                                | 4.38 | 4.37 | 4.37 | 4.33 | 4.38 | 2.91 |      |      |  |
| 10   | 2.68 | 2.68                                | 2.68 | 2.68 | 2.68 | 2.68 | 2.68 | 2.70 | 2.78 |      |  |
|      | 4.53 | 4.38                                | 4.37 | 4.37 | 4.37 | 4.36 | 4.31 | 4.35 | 2.91 |      |  |
| CdS  | 8    | 2.66                                | 2.71 | 2.69 | 2.70 | 2.70 | 2.73 | 2.75 |      |      |  |
|      |      | 3.46                                | 3.42 | 3.47 | 3.47 | 3.41 | 3.54 | 3.02 |      |      |  |
|      | 9    | 2.63                                | 3.64 | 2.64 | 2.64 | 2.64 | 2.64 | 2.67 | 2.77 |      |  |
|      |      | 3.76                                | 3.70 | 3.72 | 3.72 | 3.72 | 3.69 | 3.72 | 3.10 |      |  |
|      | 10   | 2.62                                | 2.62 | 2.61 | 2.61 | 2.61 | 2.62 | 2.62 | 2.65 | 2.76 |  |
|      |      | 3.85                                | 3.81 | 3.83 | 3.83 | 3.83 | 3.84 | 3.80 | 3.81 | 3.15 |  |
|      | CdSe | 7                                   | 2.75 | 2.76 | 2.76 | 2.76 | 2.80 | 2.86 |      |      |  |
|      |      |                                     | 4.06 | 3.94 | 3.96 | 3.90 | 4.06 | 3.08 |      |      |  |
|      |      | 8                                   | 2.73 | 2.73 | 2.73 | 2.73 | 2.74 | 2.78 | 2.88 |      |  |
|      |      |                                     | 4.15 | 4.06 | 4.08 | 4.07 | 4.03 | 4.43 | 3.10 |      |  |
| 9    |      | 2.72                                | 2.71 | 2.71 | 2.71 | 2.72 | 2.72 | 2.77 | 2.88 |      |  |
|      |      | 4.20                                | 4.13 | 4.14 | 4.14 | 4.13 | 4.08 | 4.16 | 3.11 |      |  |
| 10   |      | 2.72                                | 2.71 | 2.70 | 2.70 | 2.71 | 2.71 | 2.73 | 2.76 | 2.89 |  |
|      |      | 4.22                                | 4.16 | 4.17 | 4.17 | 4.17 | 4.15 | 4.11 | 4.16 | 3.11 |  |
| CdTe |      | 6                                   | 2.94 | 2.95 | 2.95 | 2.98 | 3.00 |      |      |      |  |
|      |      |                                     | 4.63 | 4.47 | 4.43 | 4.61 | 3.13 |      |      |      |  |
|      | 7    | 2.91                                | 2.92 | 2.92 | 2.93 | 2.96 | 3.01 |      |      |      |  |
|      |      | 4.69                                | 4.53 | 4.53 | 4.48 | 4.64 | 3.15 |      |      |      |  |
|      | 8    | 2.89                                | 2.90 | 2.90 | 2.90 | 2.91 | 2.95 | 3.01 |      |      |  |
|      |      | 4.73                                | 4.56 | 4.57 | 4.57 | 4.53 | 4.68 | 3.16 |      |      |  |
|      | 9    | 2.89                                | 2.88 | 2.89 | 2.89 | 2.89 | 2.90 | 2.95 | 3.01 |      |  |
|      |      | 4.76                                | 4.59 | 4.59 | 4.59 | 4.60 | 4.54 | 4.69 | 3.17 |      |  |
|      | 10   | 2.88                                | 2.88 | 2.88 | 2.88 | 2.88 | 2.88 | 2.89 | 2.94 | 3.01 |  |
|      |      | 4.78                                | 4.61 | 4.61 | 4.61 | 4.60 | 4.60 | 4.54 | 4.68 | 3.17 |  |

Note that in last two layers (particularly for MSe, MTe cases), the M-X interlayer distances in both bonding and non-bonding sides are almost equal due to formation of bilayer in the WZ slabs.

Table S6- Buckling distances ( $\Delta z$  in Å) of various thick 2D – ZnX (X=S, Se, Te) surface slabs.

| Layer | 1L    | 2L          | 3L | 4L | 5L | 6L | 7L | 8L | 9L | 10L |        |        |        |        |        |        |        |        |
|-------|-------|-------------|----|----|----|----|----|----|----|-----|--------|--------|--------|--------|--------|--------|--------|--------|
| 1L    | 0.02  | <b>ZnS</b>  |    |    |    |    |    |    |    |     |        |        |        |        |        |        |        |        |
| 2L    | 0.473 |             |    |    |    |    |    |    |    |     | -0.475 |        |        |        |        |        |        |        |
| 3L    | 0.254 |             |    |    |    |    |    |    |    |     | 0.006  | 0.26   |        |        |        |        |        |        |
| 4L    | 0.402 |             |    |    |    |    |    |    |    |     | -0.33  | 0.331  | -0.4   |        |        |        |        |        |
| 5L    | 0.318 |             |    |    |    |    |    |    |    |     | -0.171 | 0.005  | 0.162  | -0.309 |        |        |        |        |
| 6L    | 0.371 |             |    |    |    |    |    |    |    |     | -0.275 | 0.213  | -0.212 | 0.279  | -0.372 |        |        |        |
| 7L    | 0.007 |             |    |    |    |    |    |    |    |     | -0.005 | 0.002  | 0      | 0.002  | 0.005  | -0.007 |        |        |
| 8L    | 0.335 |             |    |    |    |    |    |    |    |     | -0.222 | 0.134  | -0.108 | 0.109  | -0.135 | 0.228  | -0.336 |        |
| 9L    | 0.324 |             |    |    |    |    |    |    |    |     | -0.203 | 0.096  | -0.045 | 0.002  | -0.035 | 0.089  | -0.194 | 0.318  |
| 10L   | 0.318 |             |    |    |    |    |    |    |    |     | -0.197 | 0.099  | -0.06  | 0.044  | -0.046 | 0.064  | -0.103 | 0.202  |
| 1L    | 0.409 | <b>ZnSe</b> |    |    |    |    |    |    |    |     |        |        |        |        |        |        |        |        |
| 2L    | 0.724 |             |    |    |    |    |    |    |    |     | -0.723 |        |        |        |        |        |        |        |
| 3L    | 0.271 |             |    |    |    |    |    |    |    |     | 0.477  | -0.584 |        |        |        |        |        |        |
| 4L    | 0.688 |             |    |    |    |    |    |    |    |     | -0.656 | 0.653  | -0.658 |        |        |        |        |        |
| 5L    | 0.022 |             |    |    |    |    |    |    |    |     | -0.018 | 0      | 0.018  | -0.022 |        |        |        |        |
| 6L    | 0.684 |             |    |    |    |    |    |    |    |     | -0.65  | 0.632  | -0.632 | 0.649  | -0.682 |        |        |        |
| 7L    | 0.658 |             |    |    |    |    |    |    |    |     | -0.629 | 0.595  | -0.595 | 0.51   | -0.426 | -0.297 |        |        |
| 8L    | 0.679 |             |    |    |    |    |    |    |    |     | -0.642 | 0.626  | -0.622 | 0.622  | -0.623 | 0.642  | -0.677 |        |
| 9L    | 0.658 |             |    |    |    |    |    |    |    |     | -0.63  | 0.603  | -0.609 | 0.597  | -0.599 | 0.511  | -0.426 | -0.296 |
| 10L   | 0.673 |             |    |    |    |    |    |    |    |     | -0.637 | 0.619  | -0.619 | 0.618  | -0.619 | 0.621  | -0.623 | 0.641  |
| 1L    | 0.565 | <b>ZnTe</b> |    |    |    |    |    |    |    |     |        |        |        |        |        |        |        |        |
| 2L    | 0.985 |             |    |    |    |    |    |    |    |     | -0.984 |        |        |        |        |        |        |        |
| 3L    | 0.66  |             |    |    |    |    |    |    |    |     | 0.942  | -0.948 |        |        |        |        |        |        |
| 4L    | 0.98  |             |    |    |    |    |    |    |    |     | -0.974 | 0.974  | -0.98  |        |        |        |        |        |
| 5L    | 0.662 |             |    |    |    |    |    |    |    |     | 0.94   | -0.938 | 0.966  | -0.965 |        |        |        |        |
| 6L    | 0.981 |             |    |    |    |    |    |    |    |     | -0.974 | 0.971  | -0.972 | 0.973  | -0.981 |        |        |        |
| 7L    | 0.663 |             |    |    |    |    |    |    |    |     | 0.939  | -0.936 | 0.962  | -0.954 | 0.969  | -0.97  |        |        |
| 8L    | 0.98  |             |    |    |    |    |    |    |    |     | -0.973 | 0.969  | -0.97  | 0.97   | -0.969 | 0.973  | -0.98  |        |
| 9L    | 0.668 |             |    |    |    |    |    |    |    |     | 0.942  | -0.939 | 0.962  | -0.955 | 0.964  | -0.957 | 0.969  | -0.968 |
| 10L   | 0.978 |             |    |    |    |    |    |    |    |     | -0.97  | 0.97   | -0.969 | 0.969  | -0.968 | 0.969  | -0.969 | 0.969  |

This buckling distances is higher value of MTe case, owing to having high covalency.

Table S7- Buckling distances (in Å) of various thick 2D– CdX (X=S, Se, Te) surface slabs.

| Layer       | 1L     | 2L     | 3L     | 4L     | 5L     | 6L     | 7L     | 8L     | 9L     | 10L    |
|-------------|--------|--------|--------|--------|--------|--------|--------|--------|--------|--------|
| <b>CdS</b>  |        |        |        |        |        |        |        |        |        |        |
| 1L          | 0.04   |        |        |        |        |        |        |        |        |        |
| 2L          | 0.5    | -0.5   |        |        |        |        |        |        |        |        |
| 3L          | 0.429  | 0.348  | -0.272 |        |        |        |        |        |        |        |
| 4L          | 0.477  | -0.444 | 0.446  | -0.476 |        |        |        |        |        |        |
| 5L          | 0.458  | -0.392 | 0.074  | 0.364  | -0.441 |        |        |        |        |        |
| 6L          | 0.472  | -0.44  | 0.421  | -0.42  | 0.441  | -0.473 |        |        |        |        |
| 7L          | 0.461  | -0.436 | 0.382  | -0.343 | 0.082  | 0.401  | -0.458 |        |        |        |
| 8L          | 0.476  | -0.443 | 0.427  | -0.419 | 0.418  | -0.423 | 0.439  | -0.469 |        |        |
| 9L          | 0.448  | -0.392 | 0.029  | 0.359  | -0.391 | 0.42   | -0.42  | 0.444  | -0.469 |        |
| 10L         | 0.469  | -0.438 | 0.422  | -0.416 | 0.416  | -0.417 | 0.416  | -0.421 | 0.438  | -0.469 |
| <b>CdSe</b> |        |        |        |        |        |        |        |        |        |        |
| 1L          | 0.293  |        |        |        |        |        |        |        |        |        |
| 2L          | 0.728  | -0.727 |        |        |        |        |        |        |        |        |
| 3L          | -0.445 | 0.669  | -0.682 |        |        |        |        |        |        |        |
| 4L          | 0.711  | -0.701 | 0.695  | -0.712 |        |        |        |        |        |        |
| 5L          | -0.44  | 0.663  | -0.663 | 0.705  | -0.707 |        |        |        |        |        |
| 6L          | 0.712  | -0.702 | 0.695  | -0.699 | 0.707  | -0.717 |        |        |        |        |
| 7L          | 0.438  | 0.655  | -0.658 | 0.695  | -0.685 | 0.703  | -0.703 |        |        |        |
| 8L          | 0.711  | -0.702 | 0.695  | -0.693 | 0.696  | -0.694 | 0.706  | -0.713 |        |        |
| 9L          | -0.437 | 0.657  | -0.66  | 0.695  | -0.688 | 0.698  | -0.696 | 0.705  | 0.704  |        |
| 10L         | 0.719  | -0.706 | 0.693  | -0.694 | 0.698  | -0.699 | 0.696  | -0.692 | 0.7    | -0.713 |
| <b>CdTe</b> |        |        |        |        |        |        |        |        |        |        |
| 1L          | 0.46   |        |        |        |        |        |        |        |        |        |
| 2L          | 0.95   | -0.95  |        |        |        |        |        |        |        |        |
| 3L          | 0.642  | 0.905  | -0.898 |        |        |        |        |        |        |        |
| 4L          | 0.945  | -0.943 | 0.943  | -0.944 |        |        |        |        |        |        |
| 5L          | 0.689  | 0.887  | -0.878 | 0.908  | -0.903 |        |        |        |        |        |
| 6L          | 0.945  | -0.945 | 0.945  | -0.944 | 0.94   | -0.941 |        |        |        |        |
| 7L          | 0.649  | 0.918  | -0.911 | 0.941  | -0.935 | 0.941  | -0.942 |        |        |        |
| 8L          | 0.947  | -0.944 | 0.942  | -0.943 | 0.945  | -0.944 | 0.941  | -0.943 |        |        |
| 9L          | 0.65   | 0.922  | -0.913 | 0.936  | -0.943 | 0.943  | -0.935 | 0.943  | -0.939 |        |
| 10L         | 0.946  | -0.944 | 0.945  | -0.945 | 0.947  | -0.945 | 0.945  | -0.946 | 0.947  | 0.948  |

This buckling distances is higher value of MTe case, owing to having high covalency,

We calculated the exfoliation energy ( $E_{exf}$ ) to form  $n$  number of monolayers from respective surface slabs, with their thicknesses varying from 2L to 10L, from following equation.

$$E_{exf} = \frac{n * E_{1L} - E_{nL}}{n}$$

where  $E_{nL}$  is total energy of surface slab with thickness of  $nL$ ,  $E_{1L}$  is the energy of the monolayer and  $n$  is the number of layer. Deduced  $E_{exf}$  values for 2D-MO and 2D-MX surface slabs are given in Fig. S5. It shows that thinner slabs are easier to exfoliate, as compared to thicker slabs.

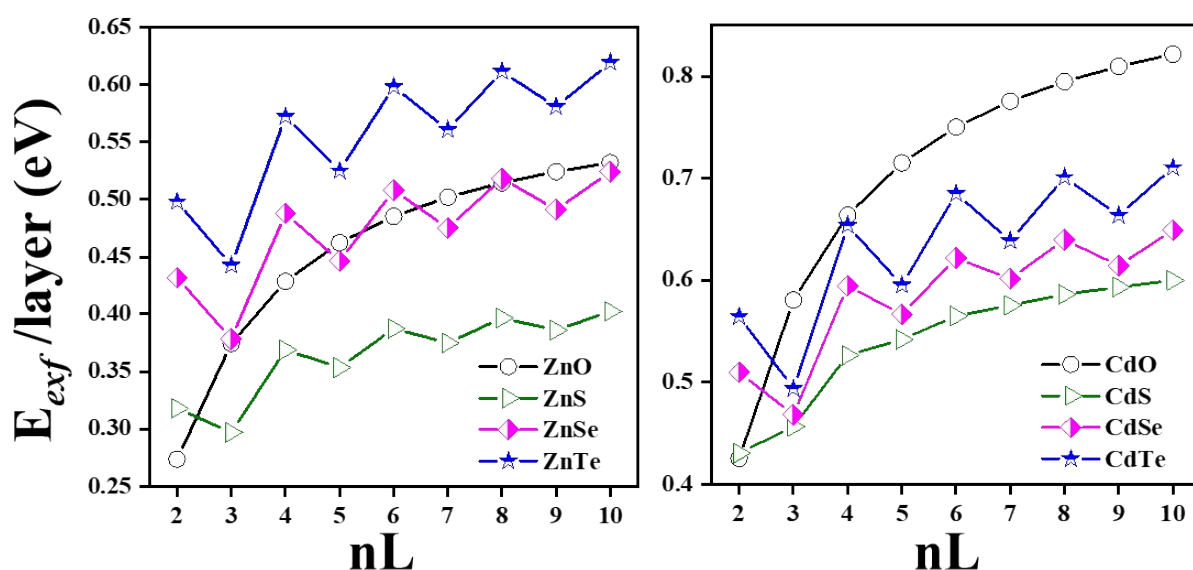

Fig. S5: Calculated  $E_{exf}$  values for various thick (2L to 10L) 2D-MO and 2D-MX surface slabs are shown.

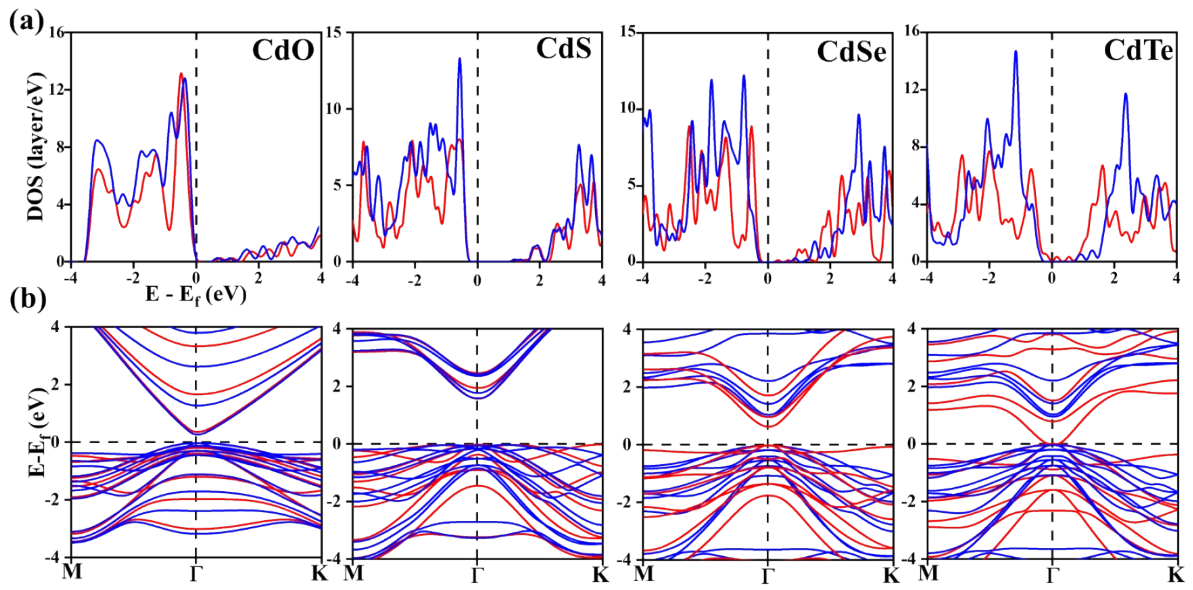

Fig. S6: DOS (a) and BS (b) of 3L (red line) and 4L (blue line) layered 2D- CdX surface slabs.



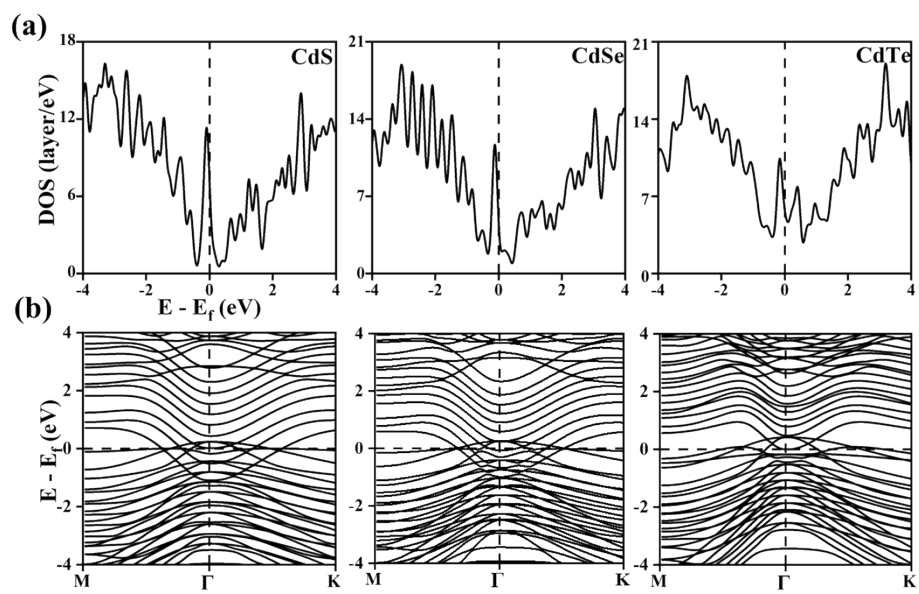

Fig. S7: DOS (a) and BS (b) of 10L thick WZ surface slab of MX compounds.

Table S7 : Elastic constants ( $C_{11}$ ,  $C_{12}$ ,  $C_{22}$ ,  $C_{66}$  in unit of N/m), layer modulus ( $\gamma$ , N/m), Young's modulus ( $Y$ , N/m), Poisson's ratio ( $\nu$ ) of 2L 2D-MX compounds are given.

| MX   | Elastic Constants (N/m) |          |          | Layer modulus ( $\gamma$ ) | Young modulus (N/m) | Poisson's ratio ( $\nu$ ) |
|------|-------------------------|----------|----------|----------------------------|---------------------|---------------------------|
|      | $C_{11}$                | $C_{12}$ | $C_{66}$ |                            |                     |                           |
| ZnO  | 124.4                   | 79.09    | 22.66    | 90.43                      | 74.139              | 0.636                     |
| ZnS  | 72.98                   | 28.36    | 22.31    | 39.51                      | 61.967              | 0.389                     |
| ZnSe | 61.45                   | 21.61    | 19.92    | 31.57                      | 53.85               | 0.352                     |
| ZnTe | 54.08                   | 16.74    | 18.67    | 26.07                      | 48.895              | 0.31                      |
| CdO  | 95.40                   | 76.74    | 9.33     | 81.40                      | 33.673              | 0.804                     |
| CdS  | 53.30                   | 27.98    | 12.66    | 34.31                      | 38.608              | 0.525                     |
| CdSe | 42.93                   | 19.38    | 11.77    | 25.27                      | 34.178              | 0.452                     |
| CdTe | 39.41                   | 15.85    | 11.78    | 21.74                      | 33.027              | 0.402                     |

These following formulae are used to calculate mechanical properties mentioned in table as follows:

$$\gamma = \frac{1}{4}(c_{11} + c_{12} + 2c_{12})$$

$$Y = \frac{(C_{11}C_{22} - C_{12}C_{21})}{C_{22}}$$

$$\nu = \frac{c_{21}}{C_{22}}$$

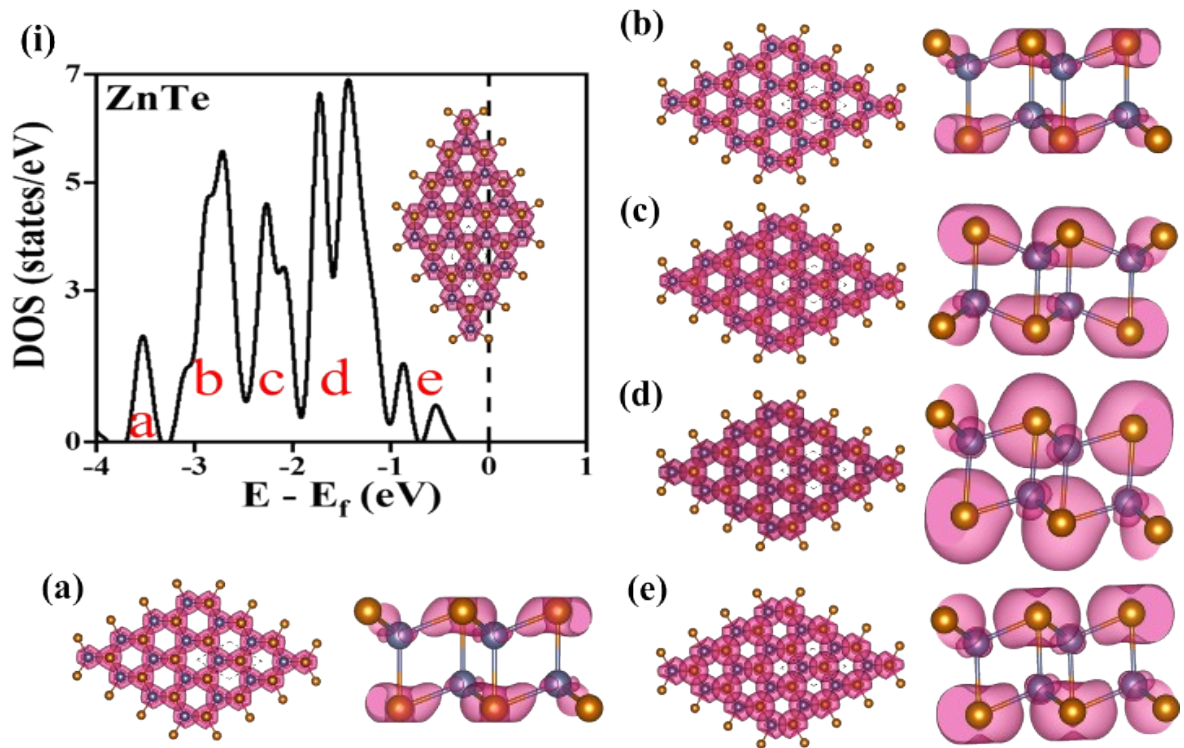

Fig. S8: Occupied DOS of 2L ZnTe is shown, where different discrete peaks (a to e) are marked. The partial charge density isosurface plots are plotted for those peaks and their side and top views are presented.

Despite of vdW driven interlayer interaction in 2D-MX surface slabs, the bonding nature within layer is explored by performing partial charge density diagrams for 2L ZnTe cases and they are shown in Fig. S5. Structurally,  $sp^3$  hybridized cations (M) are located in the centre of tetrahedra that is formed by X atoms. Each X atom interacts with three M atoms and holding one lone pair, forming trigonal pyramid shape with bond angle of  $107^\circ$ . It is also seen in the charge density diagrams, donut like shapes (mixing of  $p_x$  and  $p_y$  orbitals) that are presented in the both sides of bonding states ( $sp^3$  orbitals).

Table S9: Band gap (in eV) of various thicknesses (nL) of 2D-MX surface slabs are shown, along with WZ bulk.

| nL         | ZnO  | ZnS   | ZnSe  | ZnTe  | CdO  | CdS   | CdSe  | CdTe |
|------------|------|-------|-------|-------|------|-------|-------|------|
| 1          | 1.66 | 2.61  | 1.91  | 1.694 | 0.83 | 1.68  | 1.33  | 1.31 |
| 2          | 1.41 | 2.66  | 1.85  | 1.01  | 0.55 | 1.87  | 1.61  | 1.11 |
| 3          | 1.28 | 1.54  | 0.62  | 0.06  | 0.39 | 1.60  | 0.66  | 0.00 |
| 4          | 1.20 | 2.34* | 1.67  | 0.91  | 0.30 | 1.61* | 1.28* | 0.99 |
| 5          | 1.15 | 1.98  | 0.55  | 0.047 | 0.24 | 1.44* | 0.85* | 0.00 |
| 6          | 1.11 | 2.12* | 1.55* | 0.885 | 0.20 | 1.52* | 1.09* | 0.96 |
| 7          | 1.08 | 1.86  | 0.52  | 0.073 | 0.17 | 1.47  | 0.51  | 0.00 |
| 8          | 1.07 | 2.00* | 1.46* | 0.883 | 0.14 | 1.47* | 0.98* | 0.90 |
| 9          | 1.05 | 1.91  | 0.54  | 0.07  | 0.12 | 1.43* | 0.47* | 0.00 |
| 10         | 1.04 | 1.96* | 1.40* | 0.87  | 0.10 | 1.42* | 0.90  | 0.88 |
| $\infty$ L | 0.94 | 1.81  | 1.29  | 0.93  | 0.00 | 1.25  | 0.74  | 1.06 |
| WZ Bulk    | 0.76 | 2.28  | 1.40  | 1.36  | 0.00 | 1.23  | 0.67  | 0.78 |

The band gap is calculated by deducing BS calculations. We observed direct band gap in all the cases. It is also noticed that indirect band gap value, in a few cases (\* marked), is also lied closer to direct band gap.

Table S10 (a): Effective mass ( $e^*$ ) of various thicknesses of 2D-ZnX various surface slabs

| nL | electron ( $e_e^*$ ) |      |      |      | hole ( $e_h^*$ ) |      |      |      |
|----|----------------------|------|------|------|------------------|------|------|------|
|    | ZnO                  | ZnS  | ZnSe | ZnTe | ZnO              | ZnS  | ZnSe | ZnTe |
| 1  | 0.28                 | 0.19 | 0.14 | 0.12 | 1.07             | 0.72 | 0.71 | 0.97 |
| 2  | 0.24                 | 0.21 | 0.15 | 0.12 | 1.19             | 1.35 | 1.03 | 1.38 |
| 3  | 0.22                 | 0.2  | 0.15 | 0.11 | 1.26             | 0.68 | 0.74 | 1    |
| 4  | 0.21                 | 0.2  | 0.15 | 0.12 | 1.3              | 1.03 | 1.12 | 1.12 |
| 5  | 0.2                  | 0.19 | 0.15 | 0.12 | 1.33             | 0.8  | 0.82 | 0.66 |
| 6  | 0.2                  | 0.19 | 0.15 | 0.13 | 1.36             | 1.26 | 0.4  | 1.01 |
| 7  | 0.2                  | 0.19 | 0.15 | 0.12 | 1.37             | 0.82 | 0.82 | 0.99 |
| 8  | 0.19                 | 0.19 | 0.15 | 0.13 | 1.39             | 1.72 | 3.31 | 1.1  |
| 9  | 0.19                 | 0.19 | 0.15 | 0.12 | 1.43             | 2.92 | 0.82 | 0.98 |
| 10 | 0.19                 | 0.19 | 0.15 | 0.13 | 1.44             | 2.56 | 3.07 | 1.1  |

Table S10 (b): Effective mass ( $e^*$ ) of various thicknesses of 2D-CdX various surface slabs.

| nL | electron ( $e_e^*$ ) |      |      |      | hole ( $e_h^*$ ) |      |      |      |
|----|----------------------|------|------|------|------------------|------|------|------|
|    | CdO                  | CdS  | CdSe | CdTe | CdO              | CdS  | CdSe | CdTe |
| 1  | 0.2                  | 0.16 | 0.14 | 0.13 | 0.53             | 0.65 | 0.69 | 0.67 |
| 2  | 0.17                 | 0.12 | 0.19 | 0.13 | 0.76             | 1.13 | 0.89 | 0.93 |
| 3  | 0.16                 | 0.16 | 0.14 | 0.13 | 1.31             | 0.86 | 0.89 | 0.99 |
| 4  | 0.16                 | 0.18 | 0.16 | 0.14 | 1.41             | 0.89 | 2.66 | 1.22 |
| 5  | 0.16                 | 0.16 | 0.13 | 0.14 | 1.87             | 0.91 | 0.75 | 1    |
| 6  | 0.17                 | 0.17 | 0.15 | 0.16 | 1.4              | 1.49 | 0.28 | 1.26 |
| 7  | 0.18                 | 0.17 | 0.15 | 0.13 | 1.4              | 1.06 | 0.89 | 1.01 |
| 8  | 0.19                 | 0.2  | 0.14 | 0.13 | 1.92             | 1.21 | 0.8  | 1.69 |
| 9  | 0.21                 | 0.18 | 0.14 | 0.13 | 1.72             | 1.28 | 0.9  | 1    |
| 10 | 0.22                 | 0.19 | 0.13 | 0.13 | 1.64             | 1.41 | 1.58 | 1.54 |
